# Supplementary material for: A novel class of tRNA-derived small RNAs extremely enriched in mature mouse sperm
Source: Springer Nature journal article supplement (doi:10.1038/cr.2012.141), 2012-10-09
Supplement: 41422_2012_BFcr2012141_MOESM36_ESM.pdf [file 41422_2012_BFcr2012141_MOESM36_ESM.pdf]

| A                                   | Sequence(5'-3')<br>mse-tsRNA family-3 | length(bp) | reads |        |        |
|-------------------------------------|---------------------------------------|------------|-------|--------|--------|
|                                     |                                       |            | sperm | testis | uterus |
| GCATGGGTGGTTCAGTGGTAGAATTCT         | 27                                    | 447        | 2     | 0      |        |
| GCATGGGTGGTTCAGTGGTAGAATTCTC        | 28                                    | 1926       | 1     | 0      |        |
| GCATGGGTGGTTCAGTGGTAGAATTCTCG       | 29                                    | 4829       | 0     | 0      |        |
| GCATGGGTGGTTCAGTGGTAGAATTCTCGC      | <b>30</b>                             | 31269      | 1     | 0      |        |
| GCATGGGTGGTTCAGTGGTAGAATTCTCGCC     | <b>31</b>                             | 13135      | 0     | 0      |        |
| GCATGGGTGGTTCAGTGGTAGAATTCTCGCCT    | 32                                    | 11204      | 1     | 0      |        |
| GCATGGGTGGTTCAGTGGTAGAATTCTCGCCTG   | 33                                    | 966        | 1     | 0      |        |
| GCATGGGTGGTTCAGTGGTAGAATTCTCGCCTGC  | <b>34</b>                             | 15821      | 7     | 0      |        |
| GCATGGGTGGTTCAGTGGTAGAATTCTCGCCTGCC | 35                                    | 389        | 1     | 0      |        |
|                                     |                                       | 79986      | 14    | 0      |        |

| B                                    | mse-tsRNA family-4 | length(bp) | reads |        |        |
|--------------------------------------|--------------------|------------|-------|--------|--------|
|                                      |                    |            | sperm | testis | uterus |
| TCCCACATGGTCTAGCGGTTAGGATT           | 26                 | 1166       | 14    | 35     |        |
| TCCCACATGGTCTAGCGGTTAGGATTC          | 27                 | 186        | 102   | 11     |        |
| TCCCACATGGTCTAGCGGTTAGGATTC          | 28                 | 344        | 94    | 7      |        |
| TCCCACATGGTCTAGCGGTTAGGATTCCT        | 29                 | 215        | 278   | 3      |        |
| TCCCACATGGTCTAGCGGTTAGGATTCCTG       | 30                 | 2821       | 1389  | 0      |        |
| TCCCACATGGTCTAGCGGTTAGGATTCCTGG      | <b>31</b>          | 30068      | 358   | 0      |        |
| TCCCACATGGTCTAGCGGTTAGGATTCCTGGT     | 32                 | 7447       | 54    | 0      |        |
| TCCCACATGGTCTAGCGGTTAGGATTCCTGGTT    | 33                 | 6472       | 357   | 0      |        |
| TCCCACATGGTCTAGCGGTTAGGATTCCTGGTTT   | <b>34</b>          | 10270      | 12    | 0      |        |
| TCCCACATGGTCTAGCGGTTAGGATTCCTGGTTTTC | 35                 | 5106       | 5     | 0      |        |
| TCCCACATGGTCTAGCGGTTAGGATTCCTGGTTTTC | <b>36</b>          | 13301      | 1     | 0      |        |
|                                      |                    | 77396      | 2664  | 56     |        |

| C                                     | mse-tsRNA family-5 | length(bp) | reads |        |        |
|---------------------------------------|--------------------|------------|-------|--------|--------|
|                                       |                    |            | sperm | testis | uterus |
| GTTTCCGTAGTGTAGTGGTTATCAC             | 25                 | 180        | 3     | 1      |        |
| GTTTCCGTAGTGTAGTGGTTATCACG            | 26                 | 1647       | 3     | 2      |        |
| GTTTCCGTAGTGTAGTGGTTATCACG            | 27                 | 585        | 13    | 6      |        |
| GTTTCCGTAGTGTAGTGGTTATCACGTT          | 28                 | 484        | 4     | 2      |        |
| GTTTCCGTAGTGTAGTGGTTATCACGTTTC        | 29                 | 361        | 9     | 2      |        |
| GTTTCCGTAGTGTAGTGGTTATCACGTTTCG       | 30                 | 795        | 5     | 0      |        |
| GTTTCCGTAGTGTAGTGGTTATCACGTTTCGC      | <b>31</b>          | 6075       | 9     | 0      |        |
| GTTTCCGTAGTGTAGTGGTTATCACGTTTCGCC     | 32                 | 5866       | 28    | 0      |        |
| GTTTCCGTAGTGTAGTGGTTATCACGTTTCGCCT    | <b>33</b>          | 26772      | 40    | 0      |        |
| GTTTCCGTAGTGTAGTGGTTATCACGTTTCGCCTC   | <b>34</b>          | 28030      | 29    | 0      |        |
| GTTTCCGTAGTGTAGTGGTTATCACGTTTCGCCTCA  | 35                 | 1499       | 1     | 0      |        |
| GTTTCCGTAGTGTAGTGGTTATCACGTTTCGCCTCAC | 36                 | 1635       | 0     | 0      |        |
|                                       |                    | 73929      | 144   | 13     |        |

| D                                    | mse-tsRNA family-6 | length(bp) | reads |        |        |
|--------------------------------------|--------------------|------------|-------|--------|--------|
|                                      |                    |            | sperm | testis | uterus |
| TCCCATATGGTCTAGCGGTTAGGATT           | 26                 | 676        | 17    | 9      |        |
| TCCCATATGGTCTAGCGGTTAGGATTC          | 27                 | 92         | 114   | 6      |        |
| TCCCATATGGTCTAGCGGTTAGGATTC          | 28                 | 190        | 109   | 5      |        |
| TCCCATATGGTCTAGCGGTTAGGATTCCT        | 29                 | 111        | 441   | 0      |        |
| TCCCATATGGTCTAGCGGTTAGGATTCCTG       | 30                 | 1144       | 1954  | 0      |        |
| TCCCATATGGTCTAGCGGTTAGGATTCCTGG      | <b>31</b>          | 12381      | 666   | 0      |        |
| TCCCATATGGTCTAGCGGTTAGGATTCCTGGT     | 32                 | 3099       | 69    | 0      |        |
| TCCCATATGGTCTAGCGGTTAGGATTCCTGGTT    | 33                 | 2988       | 508   | 0      |        |
| TCCCATATGGTCTAGCGGTTAGGATTCCTGGTTT   | <b>34</b>          | 4687       | 5     | 0      |        |
| TCCCATATGGTCTAGCGGTTAGGATTCCTGGTTTTC | 35                 | 2485       | 4     | 0      |        |
| TCCCATATGGTCTAGCGGTTAGGATTCCTGGTTTTC | <b>36</b>          | 5827       | 1     | 0      |        |
|                                      |                    | 33680      | 3888  | 20     |        |

| E                                   | mse-tsRNA family-7 | length(bp) | reads |        |        |
|-------------------------------------|--------------------|------------|-------|--------|--------|
|                                     |                    |            | sperm | testis | uterus |
| GGGGGTATAGCTCAGTGGTAGAGCA           | 25                 | 514        | 0     | 5      |        |
| GGGGGTATAGCTCAGTGGTAGAGCAT          | 26                 | 37         | 0     | 2      |        |
| GGGGGTATAGCTCAGTGGTAGAGCATT         | 27                 | 22         | 0     | 8      |        |
| GGGGGTATAGCTCAGTGGTAGAGCATTG        | 28                 | 18         | 0     | 0      |        |
| GGGGGTATAGCTCAGTGGTAGAGCATTTG       | 29                 | 113        | 0     | 0      |        |
| GGGGGTATAGCTCAGTGGTAGAGCATTTGA      | 30                 | 385        | 11    | 1      |        |
| GGGGGTATAGCTCAGTGGTAGAGCATTTGAC     | 31                 | 85         | 10    | 0      |        |
| GGGGGTATAGCTCAGTGGTAGAGCATTTGACT    | <b>32</b>          | 5401       | 18    | 0      |        |
| GGGGGTATAGCTCAGTGGTAGAGCATTTGACTG   | <b>33</b>          | 2557       | 18    | 0      |        |
| GGGGGTATAGCTCAGTGGTAGAGCATTTGACTGC  | <b>34</b>          | 21985      | 30    | 0      |        |
| GGGGGTATAGCTCAGTGGTAGAGCATTTGACTGCA | 35                 | 109        | 9     | 0      |        |
|                                     |                    | 31226      | 96    | 16     |        |

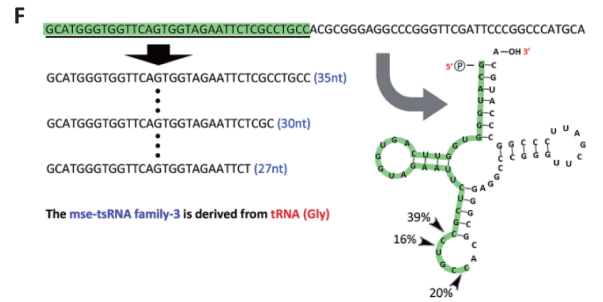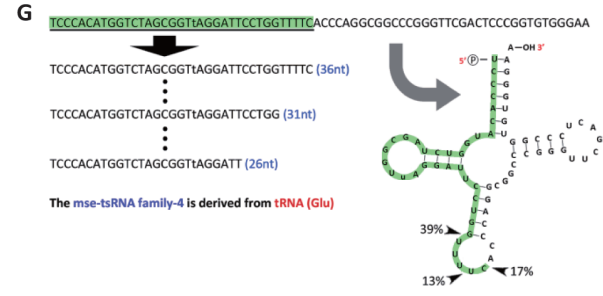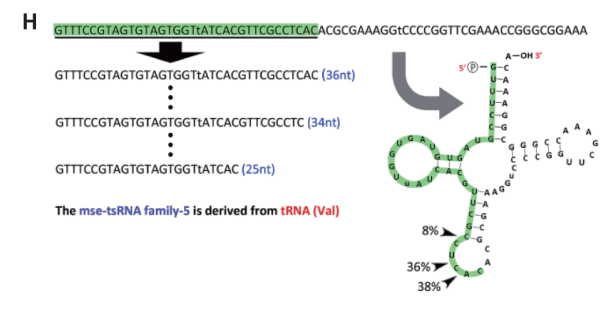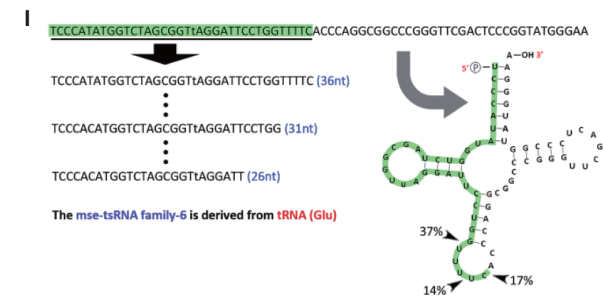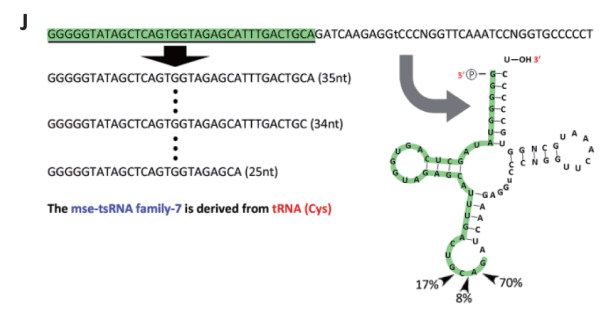

**Supplementary information, Figure S2** Alignments, statistics and tRNA origin of mse-tsRNA families 3-7 in mature sperm, testis and uterus. **(A-E)** Alignments and statistics of mse-tsRNA families 3-7 in mature sperm, testis and uterus. The top three enriched length for each family were highlighted. **(F-J)** Illustrations showing tRNA origin of mse-tsRNA families 3-7, all these mse-tsRNA families are derived from 5' halves of tRNA. The top three cleavage sites were marked by arrow heads. The preferred length distribution at 30-34 nt and cleavage sites suggested specific nuclease involved in the cleavage, possibly by recognizing the anticodon loops.
