# Supplementary material for: A novel class of tRNA-derived small RNAs extremely enriched in mature mouse sperm
Source: Springer Nature journal article supplement (doi:10.1038/cr.2012.141), 2012-10-09
Supplement: 41422_2012_BFcr2012141_MOESM37_ESM.pdf [file 41422_2012_BFcr2012141_MOESM37_ESM.pdf]

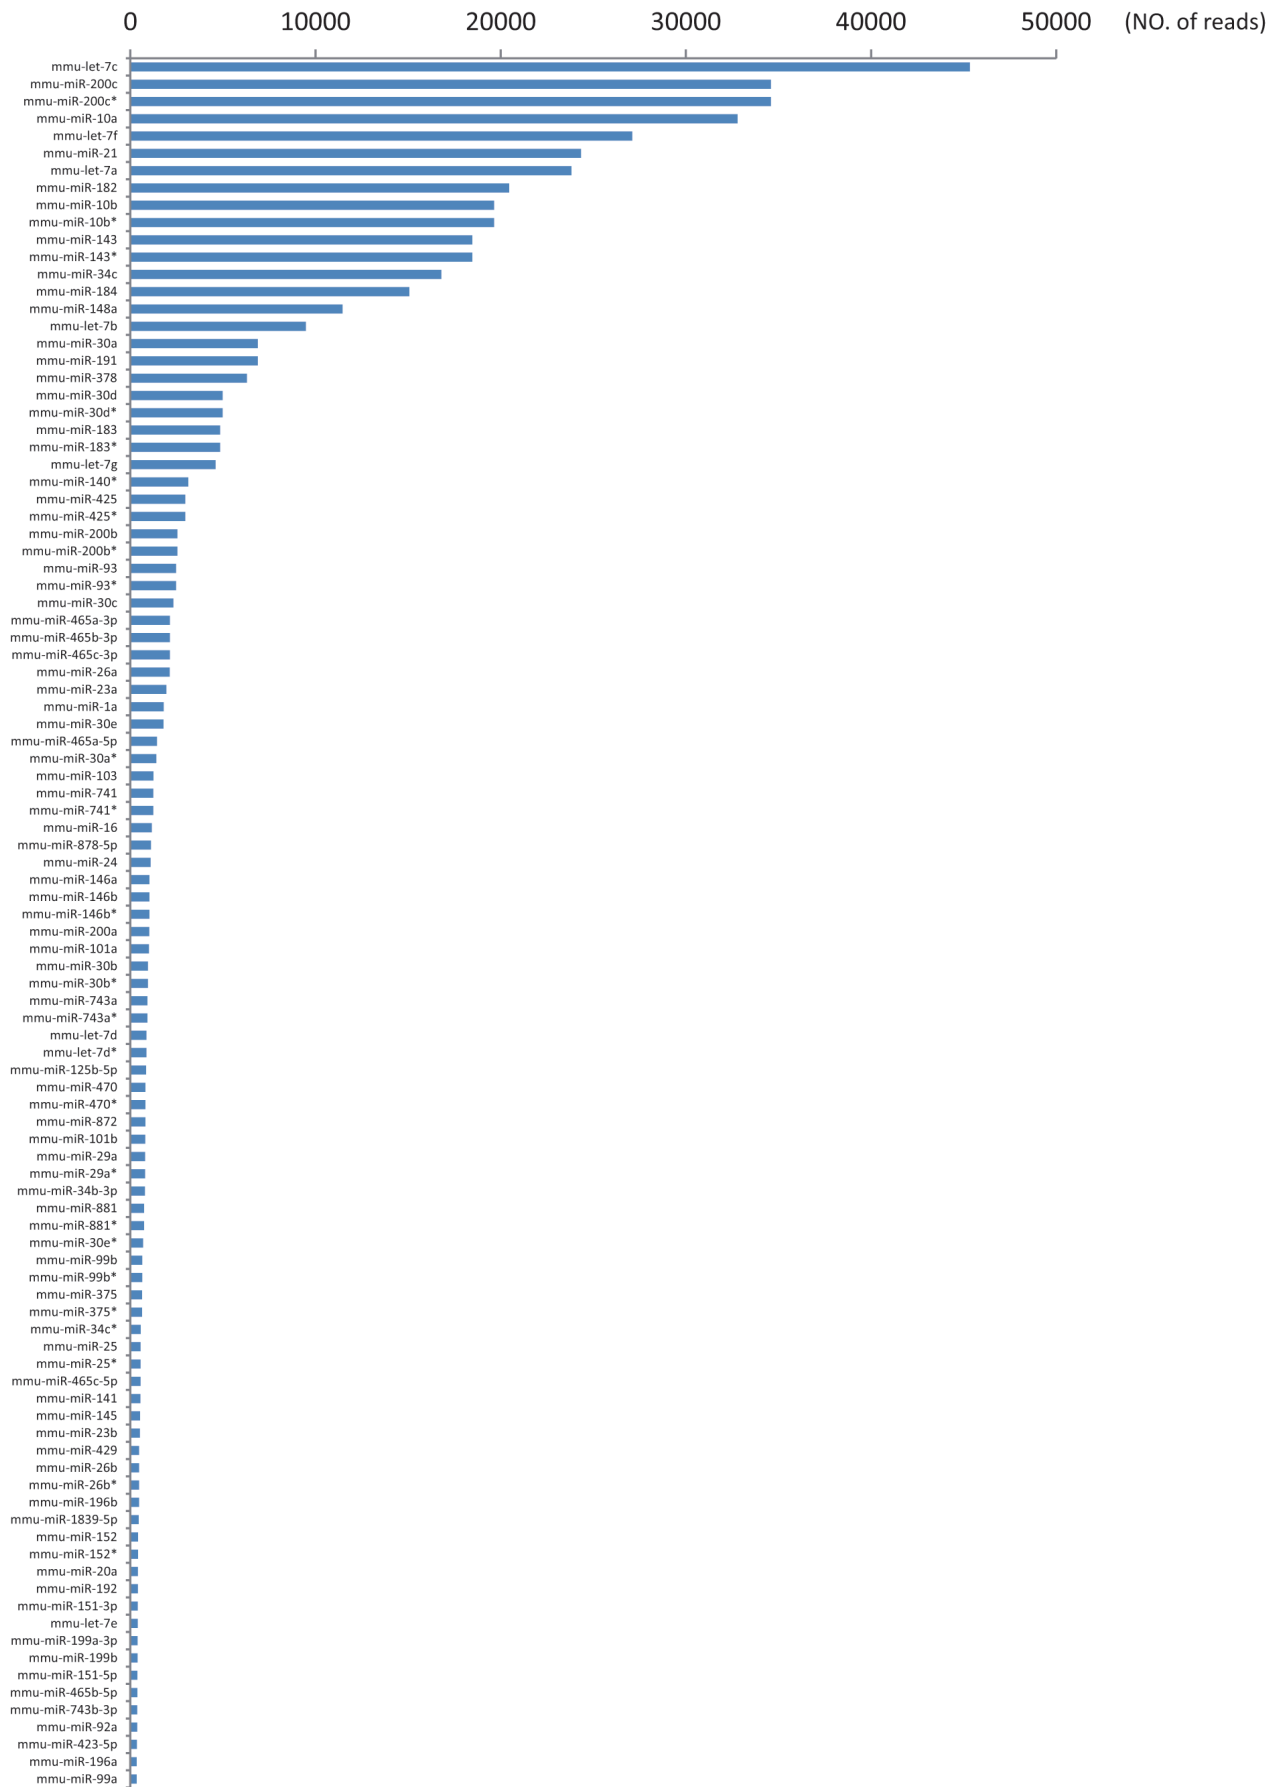

**Supplementary information, Figure S3** miRNA profiles in mature mouse sperm. The top 100 expressed miRNAs are listed, which take up 97.24% of all miRNA reads in mature mouse sperm.
