# Supplementary material for: A novel class of tRNA-derived small RNAs extremely enriched in mature mouse sperm
Source: Springer Nature journal article supplement (doi:10.1038/cr.2012.141), 2012-10-09
Supplement: 41422_2012_BFcr2012141_MOESM38_ESM.pdf [file 41422_2012_BFcr2012141_MOESM38_ESM.pdf]

**A**

Quantitative Analysis of mse-tsRNA family-1  
by Real Time RT-PCR

| Samples  | C <sub>t</sub> value | Relative amount |
|----------|----------------------|-----------------|
| Oocytes  | 22.77 ± 0.22         | 1.00            |
| Zygotes  | 24.69 ± 0.16         | 0.26            |
| Partheno | 23.46 ± 0.11         | 0.61            |

Data of relative amount are normalized to the C<sub>t</sub> of oocytes and calculated by the  $2^{-\Delta C_t}$  method

**B**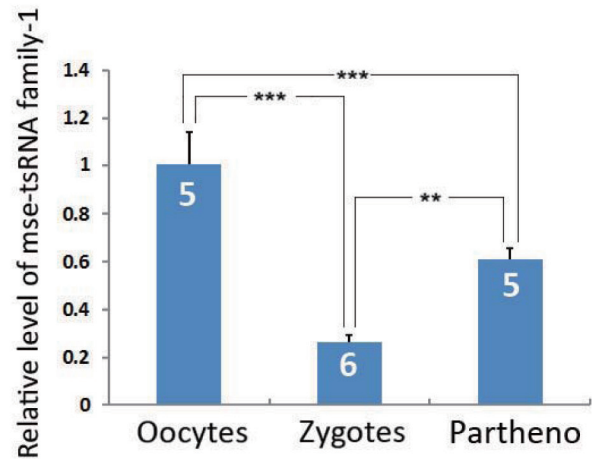

**Supplementary information, Figure S4** Quantitative analysis of mse-tsRNA family-1 in oocytes, zygotes and parthenogenetically activated oocytes. For the quantitative examination, 100 embryos were pooled for RNA extraction as an independent sample. We collected 5 samples for oocytes (100 x 5), 6 samples for zygotes (100 x 6) and 5 samples for parthenogenetically activated oocytes (100 x 5). Then the RNAs were extracted for each sample followed by quantitative RT-PCR for mse-tsRNA family-1. **(A, B)** C<sub>t</sub> value and relative expression level of mse-tsRNA family-1 (\*\*\*)  $p < 0.001$ , \*\*  $p < 0.01$ , Error bar: SEM). Numbers within the columns represented the independent samples used for each group.
