# Supplementary material for: A novel class of tRNA-derived small RNAs extremely enriched in mature mouse sperm
Source: Springer Nature journal article supplement (doi:10.1038/cr.2012.141), 2012-10-09
Supplement: 41422_2012_BFcr2012141_MOESM39_ESM.pdf [file 41422_2012_BFcr2012141_MOESM39_ESM.pdf]

| Libraries                    | Mature sperm |           | Adult testis |           | Uterus   |           |
|------------------------------|--------------|-----------|--------------|-----------|----------|-----------|
|                              | Reads        | Sequences | Reads        | Sequences | Reads    | Sequences |
| After adapters being removed | 15690722     | 1302963   | 23783785     | 2512006   | 15876066 | 526203    |
| Mapping to genome            | 8720312      | 631580    | 16493791     | 1286548   | 12466462 | 196535    |

**Supplementary information, Table S1** Statistics of small RNA reads and genome mapping data for Mature sperm, Adult testis and Uterus.
