# Supplementary material for: A novel class of tRNA-derived small RNAs extremely enriched in mature mouse sperm
Source: Springer Nature journal article supplement (doi:10.1038/cr.2012.141), 2012-10-09
Supplement: 41422_2012_BFcr2012141_MOESM40_ESM.pdf [file 41422_2012_BFcr2012141_MOESM40_ESM.pdf]

| Species                         | Mse-tsRNA |
|---------------------------------|-----------|-----------|-----------|-----------|-----------|-----------|-----------|
|                                 | Family-1  | Family-2  | Family-3  | Family-4  | Family-5  | Family-6  | Family-7  |
| <i>Homo sapiens</i>             | +         | +         | +         | +         | +         | +         | +         |
| <i>Pan troglodytes</i>          | +         | +         | +         | +         | +         | +         | +         |
| <i>Gorilla gorilla gorilla</i>  | +         | +         | +         | +         | +         | +         | +         |
| <i>Pongo pygmaeus abelii</i>    | +         | +         | +         | +         | +         | +         | +         |
| <i>Nomascus leucogenys</i>      | +         | +         | +         | +         | +         | +         | +         |
| <i>Macaca mulatta</i>           | +         | +         | +         | +         | +         | +         | +         |
| <i>Callithrix jacchus</i>       | +         | +         | +         | +         | +         | +         | +         |
| <i>Tarsier syrichta</i>         | +         | +         | -         | +         | +         | +         | +         |
| <i>Microcebus murinus</i>       | +         | +         | +         | +         | +         | +         | +         |
| <i>Mus musculus</i>             | +         | +         | +         | +         | +         | +         | +         |
| <i>Rattus norvegicus</i>        | +         | +         | +         | +         | +         | +         | +         |
| <i>Cavia porcellus</i>          | +         | +         | +         | +         | +         | -         | +         |
| <i>Heterocephalus glaber</i>    | +         | +         | +         | +         | +         | +         | +         |
| <i>Oryctolagus cuniculus</i>    | +         | +         | +         | +         | +         | +         | +         |
| <i>Felis catus</i>              | +         | +         | +         | +         | -         | +         | +         |
| <i>Canis familiaris</i>         | +         | +         | +         | +         | +         | +         | +         |
| <i>Ailuropoda melanoleuca</i>   | -         | +         | -         | +         | +         | +         | +         |
| <i>Equus caballus</i>           | +         | +         | -         | +         | +         | +         | +         |
| <i>Bos taurus</i>               | +         | +         | +         | +         | +         | +         | +         |
| <i>Ovis aries</i>               | +         | +         | -         | +         | +         | -         | +         |
| <i>Sus scrofa</i>               | +         | +         | -         | +         | +         | +         | +         |
| <i>Loxodonta africana</i>       | +         | +         | +         | +         | +         | +         | +         |
| <i>Monodelphis domestica</i>    | +         | +         | +         | -         | +         | +         | +         |
| <i>Ornithorhynchus anatinus</i> | +         | +         | -         | -         | +         | +         | +         |
| <i>Taeniopygia guttata</i>      | +         | +         | -         | +         | -         | -         | +         |
| <i>Gallus gallus</i>            | +         | +         | -         | +         | -         | +         | +         |
| <i>Meleagris gallopavo</i>      | +         | +         | -         | -         | -         | +         | +         |
| <i>Anolis carolinensis</i>      | -         | +         | -         | -         | -         | +         | +         |
| <i>Xenopus tropicalis</i>       | +         | +         | -         | -         | +         | +         | +         |
| <i>Oryzias latipes</i>          | +         | +         | -         | -         | +         | +         | +         |
| <i>Gasterosteus aculeatus</i>   | +         | +         | -         | -         | +         | +         | +         |
| <i>Takifugu rubripes</i>        | +         | +         | -         | -         | +         | +         | +         |
| <i>Tetraodon nigroviridis</i>   | +         | +         | -         | -         | +         | +         | +         |
| <i>Danio rerio</i>              | +         | +         | -         | +         | +         | +         | +         |
| <i>Petromyzon marinus</i>       | +         | +         | -         | -         | +         | -         | +         |
| <i>Drosophila melanogaster</i>  | -         | -         | -         | -         | -         | -         | -         |
| <i>Caenorhabditis elegans</i>   | -         | -         | -         | -         | -         | -         | -         |
| <i>Arabidopsis thaliana</i>     | -         | -         | -         | -         | -         | -         | -         |

**Supplementary information, Table S2** Evolutionary conservation of tRNAs harboring mse-tsRNA family 1-7.
